# Supplementary material for: Photoswitching of monomeric and dimeric DNA-intercalating cyanine dyes for super-resolution microscopy applications
Source: Royal Society of Chemistry journal article supplement (doi:10.1039/b9pp00119k), 2010-02-10
Supplement: b9pp00119k.pdf [file b9pp00119k.pdf]

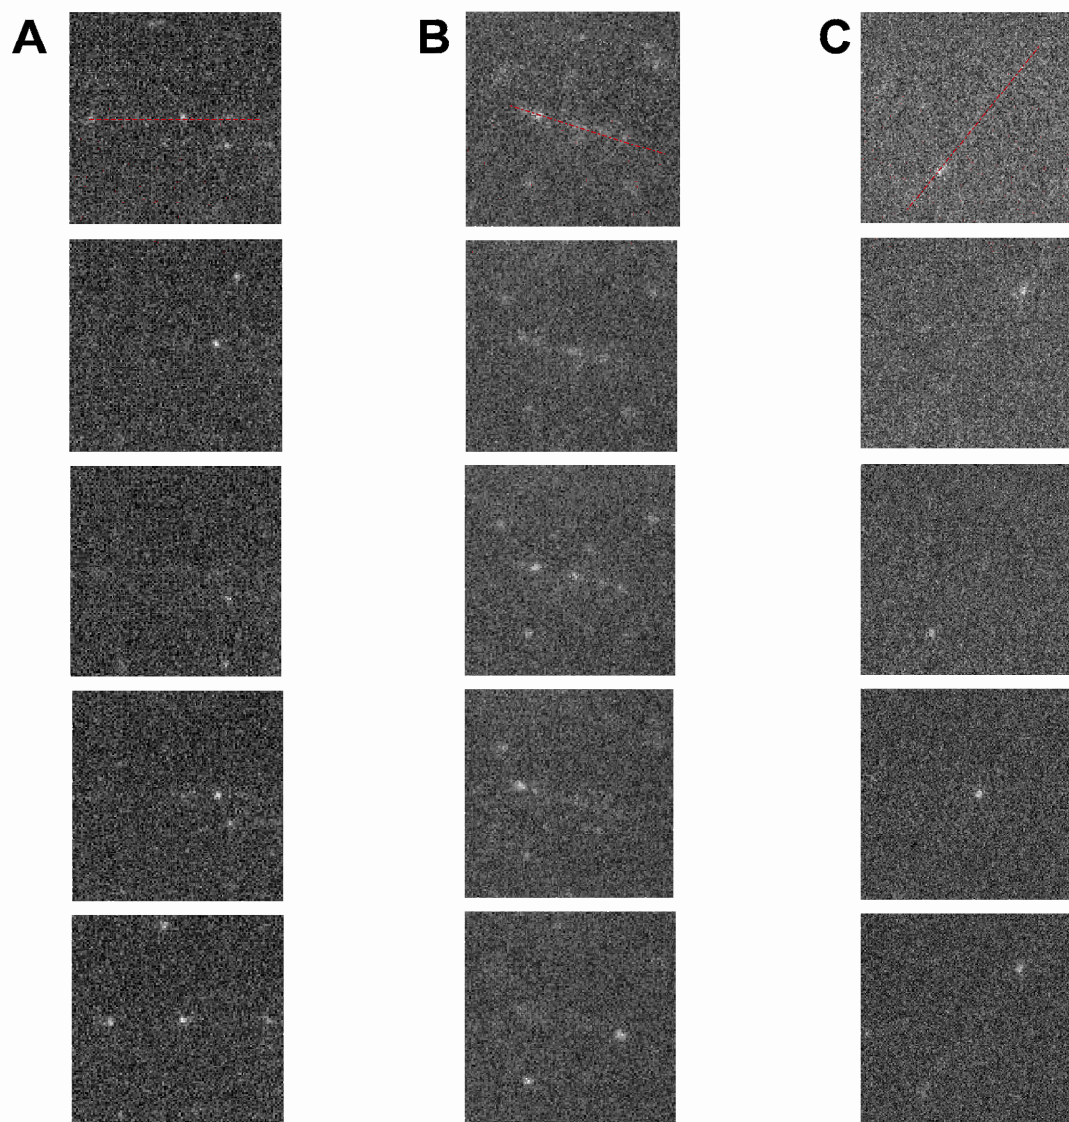

Figure S1. Selected CCD frames from single molecule experiments in the same conditions as those in Figure 2 (main text). (A) YOYO-1 (16.9, 21.2, 23.8, 24.0, 36.7 s); (B) TOTO-3 (0.1, 4.8, 6.6, 9.3, 50.3 s); (C) YO-PRO-1 (3.9, 7.4, 17.5, 48.4, 68.6 s). Red dotted lines represent the direction of the stretched DNA. Each frame is about  $10 \times 10 \mu\text{m}^2$  and the integration time is 100 ms.
